# Supplementary material
Source: PubMed Central journal article supplement (PMC6646009)
Supplement: ao8b00776_si_001.pdf [file ao8b00776_si_001.pdf]

## SUPPORTING INFORMATION

# Pillars of Life: Is There a Relationship between Lifestyle Factors and the Surface Characteristics of Dragonfly Wings?

Samuel Cheeseman<sup>†§</sup>, Stephanie Owen<sup>†§</sup>, Vi Khanh Truong<sup>†</sup>, Denny Meyer<sup>ϕ</sup>, Soon Hock Ng<sup>‡</sup>, Jitraporn Vongsvivut<sup>‡</sup>, Denver Linklater<sup>†</sup>, Mark J. Tobin<sup>‡</sup>, Marco Werner<sup>||</sup>, Vladimir A. Baulin<sup>||</sup>, Pere Luque<sup>⊥</sup>, Richard Marchant<sup>ψ</sup>, Saulius Juodkazis<sup>†</sup>, Russell J. Crawford<sup>†</sup>, and Elena P. Ivanova<sup>†\*</sup>

<sup>†</sup>School of Science, Faculty of Science, Engineering and Technology, Swinburne University of Technology, PO Box 218, Hawthorn, Victoria 3122, Australia

<sup>ϕ</sup>School of Health Sciences, Faculty of Health, Arts and Design, Swinburne University of Technology, Hawthorn, Victoria 3122, Australia

<sup>‡</sup>Infrared Microspectroscopy Beamline, Australian Synchrotron, 800 Blackburn Road, Clayton, Victoria 3168, Australia

<sup>||</sup>Departament d'Enginyeria Química, Universitat Rovira i Virgili, 26 Av. dels Paisos Catalans, 43007 Tarragona, Spain

<sup>⊥</sup>Museu de les Terres de l'Ebre, Gran Capità, 34, 43870 Amposta, Spain

<sup>ψ</sup>Museum Victoria, 11 Nicholson Street, Carlton, Vic. 3053, Australia

<sup>†</sup>School of Science, College of Science, Engineering and Health, RMIT University, Melbourne, Victoria 3001, Australia

## Supplementary Results and Discussion

**Movies S1-S7.** Bouncing Water Droplet Behavior on the Wings of Seven Species of Dragonfly. **(S1)** *Austrothemis nigrescens*, **(S2)** *Orthetrum chrysostigma*, **(S3)** *T. annulata*, **(S4)** *S. fonscolombii*, **(S5)** *Anax parthenope*, **(S6)** *Anax imperator*, **(S7)** *Onychogomphus forcipatus*.

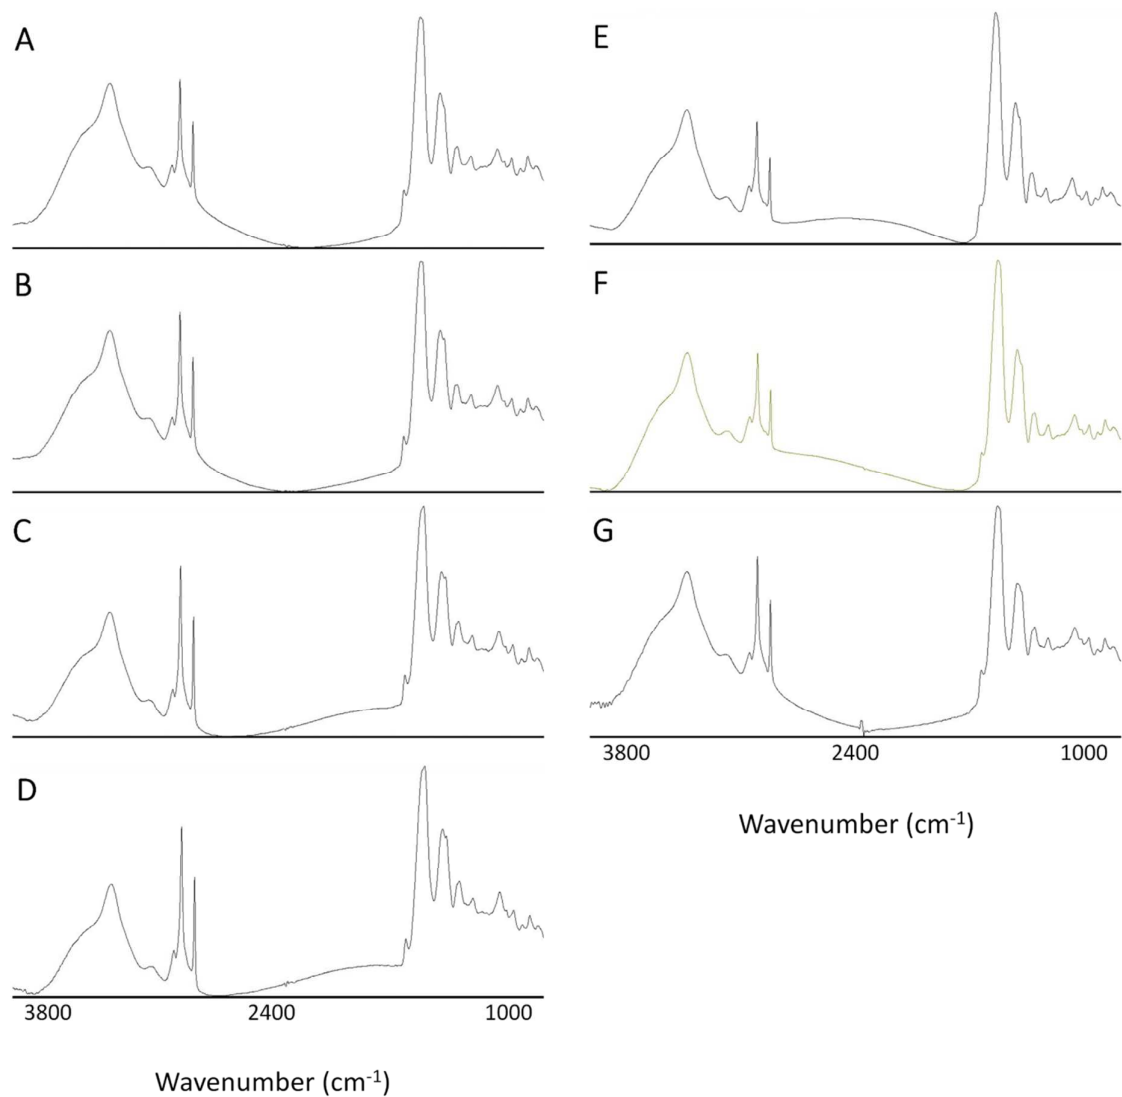

**Figure S1.** Average IR spectra of an area of the wing membrane of seven dragonfly species from three families (A) *Austrothemis nigrescens*, (B) *Orthetrum chrysostigma*, (C) *T. annulata*, (D) *S. fonscolombii*, (E) *Anax parthenope* (F) *imperator*, (G) *Onychogomphus forcipatus*.

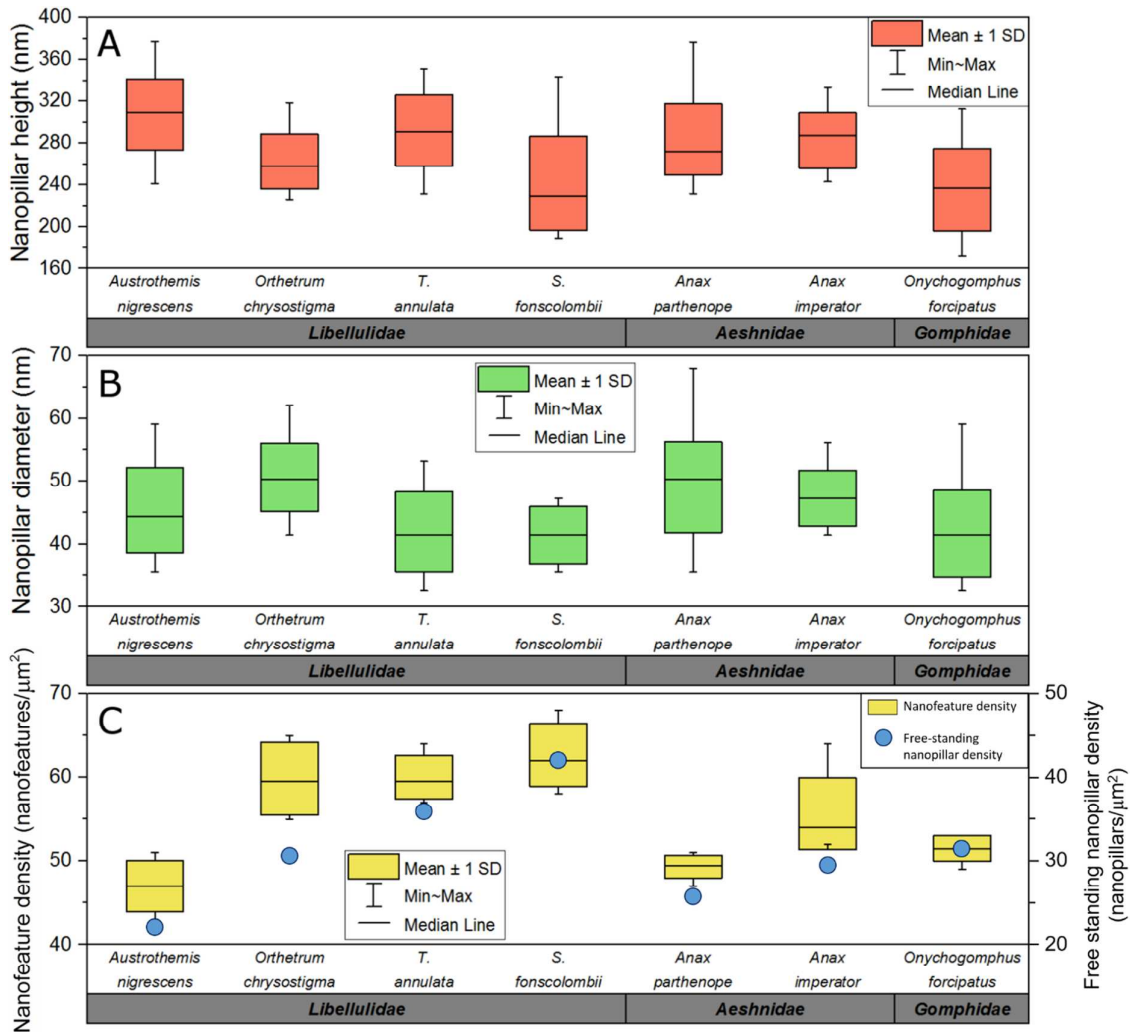

**Figure S2.** The comparative distributions of nanopillar (A) heights, (B) diameters and (C) densities on the wings of seven species of dragonfly from three families. For (A), tilted SEM images were used to measure 17 nanopillars from three different areas of the wing for each specimen. For (B), Top-view SEM images were used to measure the tip diameter of 17 free-standing nanopillars from two different areas of the wing for each specimen. For (C), particle analysis was used on top-view SEM images from six areas of the wing to determine the nanofeature density (yellow), inclusive of free-standing and clustering nanopillars, and neural network analysis was used to detect the free-standing pillar density (blue). Figure created using OriginPro 2015 (OriginLab Corporation, Northampton, MA).

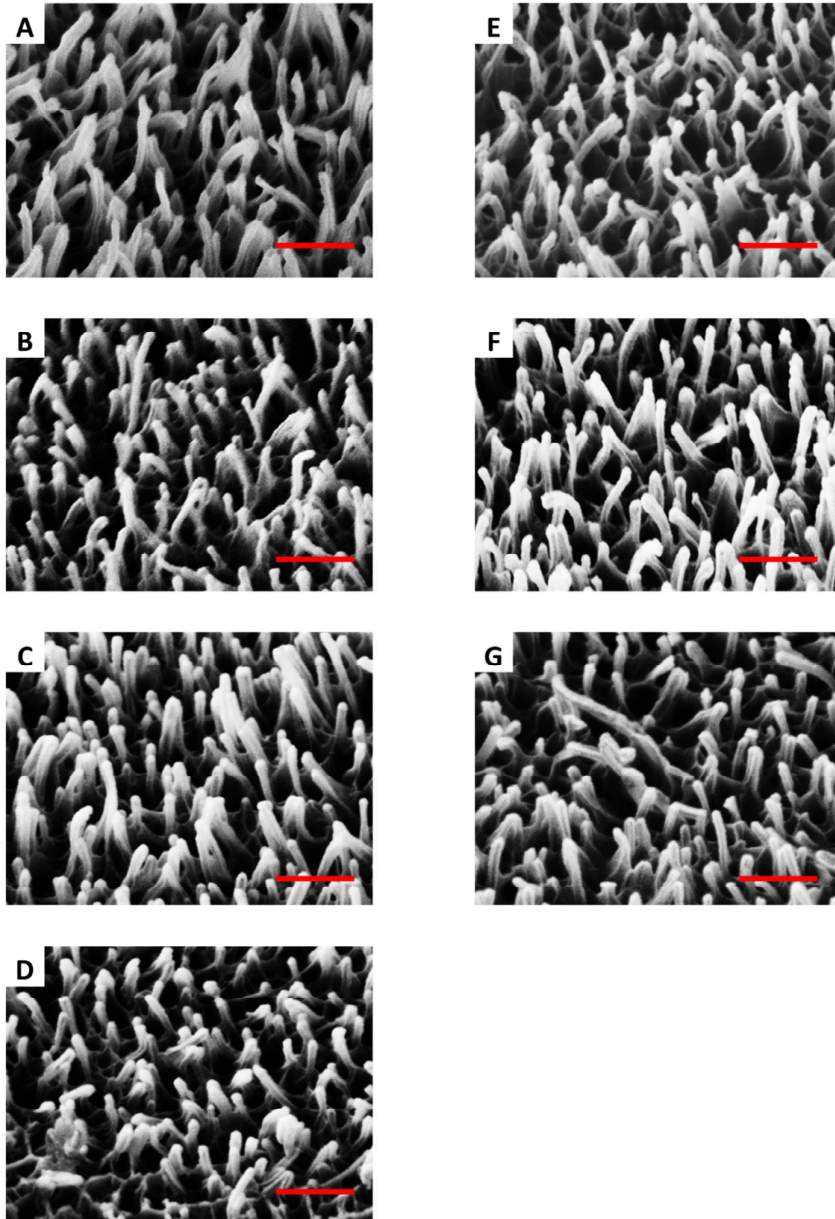

**Figure S3.** Nanopillar arrangement on the wing epicuticle of seven species of dragonfly from three families. Tilted scanning electron micrographs of (A) *Austrothemis nigrescens*, (B) *Orthetrum chrysostigma*, (C) *T. annulata*, (D) *S. fonscolombii*, (E) *Anax parthenope*, (F) *Anax imperator*, (G) *Onychogomphus forcipatus* wings. Scale bar represents 200 nm.

**Table S1. The Proportion of Variance Attributed to Interspecies Variation**

|                                               | water contact angle | nanopillar height | free standing<br>nanopillar diameter | density of<br>nanofeatures |
|-----------------------------------------------|---------------------|-------------------|--------------------------------------|----------------------------|
| interspecies<br>variance component            | 3.99                | 628.45            | 12.32                                | 33.44                      |
| intraspecies<br>variance component            | 40.73               | 1197.40           | 36.75                                | 10.05                      |
| proportion of<br>variation between<br>species | 8.9%                | 34%               | 25%                                  | 77%                        |

**Table S2. Summary of Bouncing Droplets on Wing Surfaces Including Bounce Directionality and Contact Time.**

| species                         | directional bounce <sup>a</sup> | contact time (ms) |
|---------------------------------|---------------------------------|-------------------|
| <i>Austrothemis nigrescens</i>  | both                            | 18.7 ± 1.4        |
| <i>Orthetrum chrysostigma</i>   | both                            | 14.6 ± 0.5        |
| <i>T. annulata</i>              | both                            | 15.5 ± 0.2        |
| <i>S. fonscolombii</i>          | both                            | 13.4 ± 0.9        |
| <i>Anax parthenope</i>          | lateral                         | 16.3 ± 0.8        |
| <i>Anax imperator</i>           | both                            | 15.4 ± 0.8        |
| <i>Onychogomphus forcipatus</i> | both                            | 15.8 ± 1.4        |

<sup>a</sup>Lateral refers to droplet bouncing in the anterior ↔ posterior direction.  
Both refers to bouncing in the proximal ↔ distal direction in addition to anterior ↔ posterior.

**Table S3. Nanopillar Height, Density and Diameter of Seven Species of Dragonfly by Taxonomy, Behaviour and Physical Characteristics<sup>a</sup>**

|                                 | nanopillar height (nm) |                             |                                                 | free standing nanopillar diameter (nm) |                             |                                                 | nanofeature density (nanofeatures/ $\mu\text{m}^2$ ) |                             |                                                 |
|---------------------------------|------------------------|-----------------------------|-------------------------------------------------|----------------------------------------|-----------------------------|-------------------------------------------------|------------------------------------------------------|-----------------------------|-------------------------------------------------|
|                                 | number of measures     | mean $\pm$ std dev (95% CI) | <i>t</i> -value ( <i>p</i> -value) <sup>b</sup> | number of measures                     | mean $\pm$ std dev (95% CI) | <i>t</i> -value ( <i>p</i> -value) <sup>b</sup> | number of measures                                   | mean $\pm$ std dev (95% CI) | <i>t</i> -value ( <i>p</i> -value) <sup>b</sup> |
| total                           | 119                    | 272 $\pm$ 42 (265,280)      |                                                 | 119                                    | 45 $\pm$ 7 (44,47)          |                                                 | 42                                                   | 55 $\pm$ 6 (53,57)          |                                                 |
| taxonomy <sup>c</sup>           |                        |                             |                                                 |                                        |                             |                                                 |                                                      |                             |                                                 |
| <i>Libellulidae</i>             | 68                     | 276 $\pm$ 46 (266,286)      | 0.394                                           | 68                                     | 45 $\pm$ 7 (43,46)          | -0.364                                          | 24                                                   | 57 $\pm$ 7 (54,60)          | 1.166                                           |
| <i>Austrothemis nigrecens</i>   | 17                     | 307 $\pm$ 34 (290,325)      |                                                 | 17                                     | 45 $\pm$ 7 (42,49)          |                                                 | 6                                                    | 47 $\pm$ 3 (44,50)          |                                                 |
| <i>Orthetrum chrysostigma</i>   | 17                     | 263 $\pm$ 26 (249,276)      |                                                 | 17                                     | 51 $\pm$ 5 (48,53)          |                                                 | 6                                                    | 60 $\pm$ 4 (55,64)          |                                                 |
| <i>Trithemis annulata</i>       | 17                     | 292 $\pm$ 34 (275,309)      |                                                 | 17                                     | 42 $\pm$ 6 (39,45)          |                                                 | 6                                                    | 60 $\pm$ 3 (57,63)          |                                                 |
| <i>Sympetrum foncolombii</i>    | 17                     | 242 $\pm$ 45 (219,265)      |                                                 | 17                                     | 41 $\pm$ 5 (39, 44)         |                                                 | 6                                                    | 63 $\pm$ 4 (59,66)          |                                                 |
| <i>Aeshnidae</i>                | 34                     | 283 $\pm$ 30 (273,294)      | 0.656                                           | 34                                     | 48 $\pm$ 6 (46,50)          | 1.336                                           | 12                                                   | 53 $\pm$ 4 (50,55)          | -0.701                                          |
| <i>Anax parthenope</i>          | 17                     | 284 $\pm$ 34 (266,301)      |                                                 | 17                                     | 49 $\pm$ 7 (45,53)          |                                                 | 6                                                    | 49 $\pm$ 1 (48,51)          |                                                 |
| <i>Anax imperator</i>           | 17                     | 283 $\pm$ 26 (269,296)      |                                                 | 17                                     | 47 $\pm$ 4 (45, 50)         |                                                 | 6                                                    | 56 $\pm$ 4 (51,60)          |                                                 |
| <i>Gomphidae</i>                | 17                     | 236 $\pm$ 39 (216,256)      | -1.716 (0.147)                                  | 17                                     | 42 $\pm$ 7 (38, 45)         | -1.079                                          | 6                                                    | 52 $\pm$ 2 (50,53)          | -0.622                                          |
| <i>Onychogomphus forcipatus</i> | 17                     | 236 $\pm$ 39 (216,256)      |                                                 | 17                                     | 42 $\pm$ 7 (38, 45)         |                                                 | 6                                                    | 52 $\pm$ 2 (50,53)          |                                                 |
| geography                       |                        |                             | -1.604 (0.170)                                  |                                        |                             | -0.019                                          |                                                      |                             | 1.675 (0.155)                                   |
| australian                      | 17                     | 307 $\pm$ 34 (290,325)      |                                                 | 17                                     | 45 $\pm$ 7 (42,49)          |                                                 | 6                                                    | 47 $\pm$ 3 (44,50)          |                                                 |
| european                        | 102                    | 266 $\pm$ 40 (259,274)      |                                                 | 102                                    | 45 $\pm$ 7 (44, 47)         |                                                 | 36                                                   | 56 $\pm$ 6 (55,58)          |                                                 |
| habitat preference <sup>d</sup> |                        |                             |                                                 |                                        |                             |                                                 |                                                      |                             |                                                 |
| slow/still water                |                        |                             | 1.716 (0.147)                                   |                                        |                             | 1.079                                           |                                                      |                             | 0.622                                           |
| likes                           | 102                    | 278 $\pm$ 39 (271,286)      |                                                 | 102                                    | 46 $\pm$ 7 (45,47)          |                                                 | 36                                                   | 56 $\pm$ 7 (54,58)          |                                                 |
| dislikes                        | 17                     | 236 $\pm$ 39 (216,256)      |                                                 | 17                                     | 42 $\pm$ 7 (38,45)          |                                                 | 6                                                    | 52 $\pm$ 2 (50,53)          |                                                 |
| running water                   |                        |                             | -0.495                                          |                                        |                             | -1.873 (0.120)                                  |                                                      |                             | 0.160                                           |
| likes                           | 34                     | 264 $\pm$ 46 (248,280)      |                                                 | 34                                     | 42 $\pm$ 7 (39,44)          |                                                 | 12                                                   | 56 $\pm$ 5 (53,59)          |                                                 |
| dislikes                        | 85                     | 276 $\pm$ 40 (267,284)      |                                                 | 85                                     | 47 $\pm$ 7 (45,48)          |                                                 | 30                                                   | 55 $\pm$ 7 (52,57)          |                                                 |
| migration                       |                        |                             | 0.300                                           |                                        |                             | -0.298                                          |                                                      |                             | 0.905                                           |
| migratory                       | 68                     | 275 $\pm$ 40 (265,285)      |                                                 | 68                                     | 45 $\pm$ 7 (43,46)          |                                                 | 24                                                   | 57 $\pm$ 6 (54,59)          |                                                 |
| non-migratory                   | 51                     | 269 $\pm$ 44 (256,281)      |                                                 | 51                                     | 46 $\pm$ 7 (44,48)          |                                                 | 18                                                   | 53 $\pm$ 6 (50,56)          |                                                 |
| foraging                        |                        |                             | -0.226                                          |                                        |                             | 0.331                                           |                                                      |                             | 0.271                                           |
| hawker                          | 51                     | 269 $\pm$ 40 (258,281)      |                                                 | 51                                     | 46 $\pm$ 6 (44,48)          |                                                 | 18                                                   | 56 $\pm$ 6 (53,59)          |                                                 |
| percher                         | 68                     | 274 $\pm$ 43 (264,285)      |                                                 | 68                                     | 45 $\pm$ 7 (43,47)          |                                                 | 24                                                   | 55 $\pm$ 6 (52,57)          |                                                 |

<sup>a</sup>The characteristics considered and their groupings were: families (*Libellulidae*, *Aeshnidae* or *Gomphidae*); geographical origin (Australian or European); preferred habitat (like or dislike of still or slow water and running water); migratory behaviours (migratory or non-migratory) and foraging behaviours (hawkers or perchers). <sup>b</sup>*t*-values were calculated from exploratory analysis using a hierarchical linear model. *p*-values are reported where the *t*-value approaches  $\pm 2$  and were calculated from a final estimation of fixed effects.

<sup>c</sup>Each family was recoded as a binary variable and compared to the combined other two families. <sup>d</sup>*T. annulata* likes both types of habitats and was included in both groups
